# Supplementary material for: Cannulation Technique of Vascular Access in Hemodialysis and the Impact on the Arteriovenous Fistula Survival: Systematic Review and Meta-Analysis
Source: MDPI journal article supplement (doi:10.3390/jcm12185946), 2023-09-13
Supplement: s1 [file s1]

**Table S11.** Aneurism formation/development and Unsuccessful cannulation as an outcome of the cannulation technique in arteriovenous fistulas in Observational studies

| First author                   | Study design  | Average age (years)   | Sample size        |               | Outcome            |                       | P Value  | Notes                                                 |
|--------------------------------|---------------|-----------------------|--------------------|---------------|--------------------|-----------------------|----------|-------------------------------------------------------|
|                                |               |                       | Experimental group | Control group | Experimental group | Control group         |          |                                                       |
| Aneurism formation/development |               |                       |                    |               |                    |                       |          |                                                       |
| van Loon et al. (2010) [14]    | Observational | BH = 67<br>RL = 65    | 75                 | 70            | n =1 (1%)          | n =47 (67%)           | < 0.001  | Assessed aneurysm formation                           |
| Pergolotti et al. (2011) [29]  | Observational | BH = 56<br>TRL = 66.5 | 21                 | 24            | 20%                | 45.8%                 | -        | Assessed aneurysm sized at 1 mm or more in elevation. |
| Smyth W et al. (2013) [30]     | Observational | BH = 60<br>RL =61     | 41                 | 63            | 3 (7.3%)           | 18 (28.6%)            | = 0.017  | Assessed aneurysm formation                           |
| Unsuccessful cannulation       |               |                       |                    |               |                    |                       |          |                                                       |
| van Loon et al. (2010) [14]    | Observational | BH = 67<br>RL = 65    | 75                 | 70            | Mean = 8.1 (SD =7) | Mean = 3.7 (SD = 4.7) | < 0.001  | The mean (SD) number of miscannulation                |
| Smyth W et al. (2013) [30]     | Observational | BH = 60<br>RL = 61    | 41                 | 63            | n = 92 (6.7%)      | 68 (3.6%)             | < 0.0001 | The number of unsuccessful cannulation attempts       |

Abbreviations: BH: buttonhole; TRL: traditional RL; RL: rope-ladder; SD: standard deviation
