# Supplementary material for: Cannulation Technique of Vascular Access in Hemodialysis and the Impact on the Arteriovenous Fistula Survival: Systematic Review and Meta-Analysis
Source: MDPI journal article supplement (doi:10.3390/jcm12185946), 2023-09-13
Supplement: s1 [file s1]

**Table S8.** Hematoma and bleeding time as an outcome of the cannulation technique in arteriovenous fistulas in RCT studies

| First author                                                                                                                                                                               | Study design | Average age<br>(years) | Sample size        |               | Outcome                                  |                                          | P Value | Notes                                                                      |
|--------------------------------------------------------------------------------------------------------------------------------------------------------------------------------------------|--------------|------------------------|--------------------|---------------|------------------------------------------|------------------------------------------|---------|----------------------------------------------------------------------------|
|                                                                                                                                                                                            |              |                        | Experimental group | Control group | Experimental group                       | Control group                            |         |                                                                            |
| Hematoma (n = events)                                                                                                                                                                      |              |                        |                    |               |                                          |                                          |         |                                                                            |
| Struthers J. et al. (2010) [26]                                                                                                                                                            | RCT          | BH = 61<br>TRL = 60    | 28                 | 28            | 19                                       | 27                                       | --      | N/A                                                                        |
| MacRae J. et al. (2012) [13]                                                                                                                                                               | RCT          | BH = 70.3<br>SN = 66.7 | 70                 | 70            | 295/1000<br>HD sessions                  | 436/1000<br>HD sessions                  | = 0.003 | Hematoma was categorized based on size                                     |
| Bleeding time after needle removal, (min)                                                                                                                                                  |              |                        |                    |               |                                          |                                          |         |                                                                            |
| Struthers J. et al. (2010) [26]                                                                                                                                                            | RCT          | BH = 61<br>TRL = 60    | 28                 | 28            | Mean 300 ± 26<br>seconds                 | Mean 400 ± 31<br>seconds                 | SSE     | Bleeding time after needle removal                                         |
| MacRae J. et al. (2012) [13]                                                                                                                                                               | RCT          | BH=70.3<br>SN = 66.7   | 70                 | 70            | Any bleeding<br>97.2/1000<br>HD Sessions | Any bleeding<br>97.6/1000<br>HD Sessions | = 0.40  | no bleeding <5 minutes, 5 –10 minutes,<br>or > 10 minutes bleeding post-HD |
| Vaux E. et al. (2013) [27]                                                                                                                                                                 | RCT          | BH = 62<br>UP = 64     | 58                 | 69            | median 7.9<br>IQR (6.3 – 10.4)           | median 9.1<br>IQR (6.9 -11.3)            | = 0.30  | Bleeding times in minutes                                                  |
| Abbreviations: RCT: randomized clinical trial; BH: Buttonhole; TRL: traditional RL; UP: usual practice; SN: standard needling; RL: rope-ladder; HD: hemodialysis; IQR: interquartile range |              |                        |                    |               |                                          |                                          |         |                                                                            |
