# Supplementary material for: Cannulation Technique of Vascular Access in Hemodialysis and the Impact on the Arteriovenous Fistula Survival: Systematic Review and Meta-Analysis
Source: MDPI journal article supplement (doi:10.3390/jcm12185946), 2023-09-13
Supplement: s1 [file s1]

**Table S10.** Aneurism formation/development as an outcome of the cannulation technique in arteriovenous fistulas in RCT studies

| First author                    | Study design | Average age (years) | Sample size        |               | Outcome            |               | P Value | Notes                             |
|---------------------------------|--------------|---------------------|--------------------|---------------|--------------------|---------------|---------|-----------------------------------|
|                                 |              |                     | Experimental group | Control group | Experimental group | Control group |         |                                   |
| Aneurism formation/development  |              |                     |                    |               |                    |               |         |                                   |
| Struthers J. et al. (2010) [26] | RCT          | BH = 61             | 28                 | 28            | Mean 1%            | Mean 30%      | < 0,01  | Assessed average increase in size |
|                                 |              | TRL = 60            |                    |               | SEM ± 22%          | SEM ± 7%      |         |                                   |
| Vaux E. et al. (2013) [27]      | RCT          | BH = 62             | 58                 | 69            | 23%                | 67%           | --      | - Existing aneurysm enlargement   |
|                                 |              | UP = 64             |                    |               | 2 (4%)             | 9 (17%)       |         | - New aneurysm formation          |
| Peralta R. et al. (2022) [19]   | RCT          | MuST = 68.48        | 59                 |               | n = 1 (1.7%)       |               |         | Assessed new aneurism formation   |
|                                 |              | BH = 68.78          |                    | 56            | 0                  |               |         |                                   |
|                                 |              | RL = 65.95          |                    | 57            | n = 1 (1.8%)       | --            |         |                                   |

Abbreviations: RCT: randomized clinical trial; BH: buttonhole; TRL: traditional RL; UP: usual practice; MuST: multiple single cannulation technique; RL: rope-ladder  
SEM: standard error of the mean
