# Supplementary material for: Cannulation Technique of Vascular Access in Hemodialysis and the Impact on the Arteriovenous Fistula Survival: Systematic Review and Meta-Analysis
Source: MDPI journal article supplement (doi:10.3390/jcm12185946), 2023-09-13
Supplement: s1 [file s1]

**Table S2.** Relative effect of the unassisted primary patency of arteriovenous fistula

| First author                    | Study design | Average age (years)                     | Sample size        |               | Outcome                           |                                 | <i>P</i> Value<br>log-rank test | Notes                                                                                         |
|---------------------------------|--------------|-----------------------------------------|--------------------|---------------|-----------------------------------|---------------------------------|---------------------------------|-----------------------------------------------------------------------------------------------|
|                                 |              |                                         | Experimental group | Control group | Experimental group                | Control group                   |                                 |                                                                                               |
| Vaux E. et al. (2013) [27]      | RCT          | BH = 62                                 | 58                 | 69            | 100%                              | 86%                             | = 0.005                         | - AVF survival at 1 year – (assisted primary patency)                                         |
|                                 |              | UP = 64                                 |                    |               | 74%                               | 49%                             | = 0.01                          | - Primary patency at 1-year (intent to treat)<br>- HR 0.46 (95% CI 0.25-0.87) <i>p</i> = 0.02 |
| MacRae J. et al. (2014) [16]    | RCT          | BH = 70.3<br>SN = 66.7                  | 70                 | 69            | Median 18.4<br>(IQR, 10.9 - 32.7) | Median 16<br>(IQR; 10.6 - 29.3) | = 0.2                           | - Median access survival (months)                                                             |
|                                 |              |                                         |                    |               | Median 12.7<br>(IQR, 7.8 - 19.2)  | Median 16<br>(IQR, 10.6 - 29.3) | = 0.2                           | - Median access survival (intent to treat) months                                             |
| Chan M. et al. (2014) [28]      | CCT          | BH = 60.9<br>RL = 64.1                  | 45                 | 38            | 57%                               | 60%                             | = 0.50                          | - Primary patency at 1-year<br>- HR 1.22 (95% CI 0.65-2.28) <i>p</i> = 0.53                   |
| * Peralta R. et al. (2022) [19] | RCT          | MuST= 68.48<br>BH = 68.78<br>RL = 65.95 | 59                 | 56            | 76.6%                             | 59.6%                           | = 0.003                         | - Primary patency at 1-year<br>- HR 2.13 (95% CI 1.07-4.21) <i>p</i> = 0.03                   |
|                                 |              |                                         |                    | 57            |                                   | 76.8%                           |                                 |                                                                                               |

Abbreviations: RCT: randomized clinical trial; CCT: controlled clinical trial; BH: Buttonhole; UP: usual practice; SN: standard needling; MuST: multiple single cannulation technique; RL: rope-ladder; IQR: interquartile range; HR: hazard ratio.

\* Study compares three cannulation techniques: MuST was experimental group versus buttonhole versus rope-ladder.
