# Supplementary material for: Cannulation Technique of Vascular Access in Hemodialysis and the Impact on the Arteriovenous Fistula Survival: Systematic Review and Meta-Analysis
Source: MDPI journal article supplement (doi:10.3390/jcm12185946), 2023-09-13
Supplement: s1 [file s1]

Table S1. Characteristics of included observational studies

| First author             | Publication year | Origin      | Study design     | Context                          | Sample size | Interventions                     |                             | Protocol                         |                                  | Follow up (months) | Outcomes       |
|--------------------------|------------------|-------------|------------------|----------------------------------|-------------|-----------------------------------|-----------------------------|----------------------------------|----------------------------------|--------------------|----------------|
|                          |                  |             |                  |                                  |             | Experimental group                | Control group               | Experimental group               | Control group                    |                    |                |
| van Loon et al. [14]     | 2010             | Netherlands | Observational    | Multicentric                     | 145         | BH                                | RL                          | Specified                        | Specified                        | 9                  | ① ② ④ ⑤ ⑥<br>⑦ |
| Pergolotti et al. [29]   | 2011             | USA         | Observational    | Center                           | 45          | BH                                | Traditional method          | Not specified                    | Not specified                    | 4                  | ① ③ ④          |
| *Sukthinthai et al. [32] | 2012             | Thailand    | Cross-over study | Center                           | 21          | BH                                | Area puncture method        | Specified                        | area puncture                    | 11 (3 phases)      | ① ③            |
| Mi-Kyoung K. et al. [33] | 2013             | South Korea | Cross-over study | Center                           | 32          | BH with Two pairs of tunnel tract | RL                          | Specified                        | Not specified                    | BH 3; RL 2         | ① ③            |
| Smyth W. et al. [30]     | 2013             | Australia   | Observational    | Multicentric (hospital & center) | 104         | BH                                | RL                          | Specified                        | Not specified                    | 3                  | ① ② ④ ⑤ ⑥      |
| Glerup R. et al. [31]    | 2019             | Denmark     | Observational    | Multicentric                     | 286         | BH                                | Stepladder or area puncture | Not specified & Self-cannulation | Not specified & Self-cannulation | 60                 | ⑤              |

Note: ① pain; ② hematoma; ③ bleeding time; ④ aneurisms formation/development; ⑤ bacteremia related to vascular access; ⑥ unsuccessful cannulation; ⑦ maintenance of functionality; ⑧ thrombosis; ⑨ AVF survival; ⑩ number of interventions. Abbreviations: TC: Cannulation technique; BH: Buttonhole; MuST: Multiple single cannulation technique. RL: Rope-ladder

\* The study was conducted over 11 months in 3 phases but does not specify the duration of each one.
