# Supplementary material for: Cannulation Technique of Vascular Access in Hemodialysis and the Impact on the Arteriovenous Fistula Survival: Systematic Review and Meta-Analysis
Source: MDPI journal article supplement (doi:10.3390/jcm12185946), 2023-09-13
Supplement: s1 [file s1]

**Table S5.** Bacteremia and local signs of infection as an outcome of the cannulation technique in arteriovenous fistulas in Observational studies

| First author                                                           | Study design  | Average age (years)                  | Sample size        |               | Outcome                    |                            | P Value | Notes                                                                           |
|------------------------------------------------------------------------|---------------|--------------------------------------|--------------------|---------------|----------------------------|----------------------------|---------|---------------------------------------------------------------------------------|
|                                                                        |               |                                      | Experimental group | Control group | Experimental group         | Control group              |         |                                                                                 |
| Bacteremia and local signs of infection related to access (n = events) |               |                                      |                    |               |                            |                            |         |                                                                                 |
| van Loon et al. (2010) [14]                                            | Observational | BH = 67<br>RL = 65                   | 75                 | 70            | 2<br>2                     | 0<br>0                     |         | - BH 2 Two local infections<br>- BH 2 Staphylococcus aureus                     |
| Smyth W et al. (2013) [30]                                             | Observational | BH = 60<br>RL = 61                   | 41                 | 63            | 2.34/1000<br>HD sessions   | 6.38/1000<br>HD sessions   | =1.0    | - Clinical signs of infection:<br>BH = 3 (7.3%) vs<br>RL = 4 (6.3%)             |
| Glerup R et al. (2019) [31]                                            | Observational | BH = 63.7<br>Steplader/area<br>=71.2 | 144                | 142           | 0.268/1000<br>Fistula-days | 0.038/1000<br>Fistula-days | < 0.001 | Staphylococcus aureus<br>bacteremia:<br>BH = 43 (29.86%)<br>RL/área = 5 (3.52%) |

Abbreviations: BH: buttonhole; RL: rope-ladder; HD: hemodialysis
