# Supplementary material for: Cannulation Technique of Vascular Access in Hemodialysis and the Impact on the Arteriovenous Fistula Survival: Systematic Review and Meta-Analysis
Source: MDPI journal article supplement (doi:10.3390/jcm12185946), 2023-09-13
Supplement: s1 [file s1]

**Table S3.** Number of interventions and thrombosis as the outcome of cannulation techniques in arteriovenous fistulas

| First author                    | Study design | Average age (years)      | Sample size        |               | Outcome            |               | P Value log-rank test | Notes                                                                    |
|---------------------------------|--------------|--------------------------|--------------------|---------------|--------------------|---------------|-----------------------|--------------------------------------------------------------------------|
|                                 |              |                          | Experimental group | Control group | Experimental group | Control group |                       |                                                                          |
| Number of interventions         |              |                          |                    |               |                    |               |                       |                                                                          |
| Vaux E. et al. (2013) [27]      | RCT          | BH = 62<br>UP = 64       | 58                 | 69            | n = 11 (19%)       | n =27 (39%)   |                       |                                                                          |
| Chan M. et al. (2014) [28]      | CCT          | BH = 60.9<br>RL = 64.1   | 45                 | 38            | n = 29 (64%)       | n =27 (71%)   | = 0.52                |                                                                          |
| Peralta R. et al. (2022) [19]   | RCT          | BH = 68.78<br>RL = 65.95 | 56                 | 57            | n = 18 (31.6%)     | n = 9 (16.1%) |                       |                                                                          |
| Thrombosis                      |              |                          |                    |               |                    |               |                       |                                                                          |
| Struthers J. et al. (2010) [26] | RCT          | BH = 61<br>SRL= 60       | 28                 | 28            | 1                  | 1             |                       |                                                                          |
| Vaux E. et al. (2013) [27]      | RCT          | BH = 62<br>UP = 64       | 58                 | 69            | 1                  | 8             |                       | BH - 1 AVF Successful thrombectomy<br>UP - 2 AVF Successful thrombectomy |
| MacRae J. et al. (2014) [16]    | RCT          | BH = 70.3<br>SN = 66.7   | 70                 | 69            | n =6 (8.6%)        | n =7 (10.1%)  | = 0.6                 |                                                                          |
| Peralta R. et al. (2022) [19]   | RCT          | BH = 68.78<br>RL = 65.95 | 56                 | 57            | 0                  | 1             |                       |                                                                          |

Abbreviations: RCT: randomized clinical trial; CCT: controlled clinical trial; BH: Buttonhole; UP: usual practice; SN: standard needling; MuST: multiple single cannulation technique; RL: rope-ladder.
