# Supplementary material for: Cannulation Technique of Vascular Access in Hemodialysis and the Impact on the Arteriovenous Fistula Survival: Systematic Review and Meta-Analysis
Source: MDPI journal article supplement (doi:10.3390/jcm12185946), 2023-09-13
Supplement: s1 [file s1]

**Table S9.** Hematoma and bleeding time as an outcome of the cannulation technique in arteriovenous fistulas in Observational studies

| First author                              | Study design  | Average age<br>(years) | Sample size        |               | Outcome                                         |                                                              | P Value              | Notes                                                                              |
|-------------------------------------------|---------------|------------------------|--------------------|---------------|-------------------------------------------------|--------------------------------------------------------------|----------------------|------------------------------------------------------------------------------------|
|                                           |               |                        | Experimental group | Control group | Experimental group                              | Control group                                                |                      |                                                                                    |
| Hematoma (n)                              |               |                        |                    |               |                                                 |                                                              |                      |                                                                                    |
| van Loon et al. (2010) [14]               | Observational | BH = 67<br>RL = 65     | 75                 | 70            | Mean 2.0 SD = 3.7                               | Mean 14 SD = 15.6                                            | < 0.0001             | Hematoma: An abnormal localized infiltration of blood caused by needle cannulation |
| Smyth W et al. (2013) [30]                | Observational | BH = 60<br>RL = 61     | 41                 | 63            | n = 11 (26.8%)                                  | n = 20 (31.7%)                                               | = 0.752              |                                                                                    |
| Bleeding time after needle removal, (min) |               |                        |                    |               |                                                 |                                                              |                      |                                                                                    |
| Pergolotti et al. (2011) [29]             | Observational | BH = 56<br>TRL = 66.5  | 21                 | 24            | Hemostasis time less<br>23.7%                   | -                                                            | = 0.0066             |                                                                                    |
| Sukthinthai et al. (2012) [32]            | Cross-over    | 56.3                   | 21                 | 21            | A = 4.19 ± 1.66<br>V = 3.92 ± 1.37              | A = 9.12 ± 2.36<br>V = 3.12 ± 2.36                           | < 0.0001<br>< 0.0001 | Hemostasis after needle withdrawal in minutes                                      |
| Mi-Kyoung KIM et al. (2013) [33]          | Cross-over    | 62.4                   | 32                 | 32            | <15 n = 15 (46.9%)<br>16-30 n = 17 (53.1%)<br>- | <15 n = 7 (21.9%)<br>16-30 n = 16 (50%)<br>>30 n = 9 (28.1%) | < 0.001<br>= 0.028   | Results referring to the first assessment for A and V cannulation in minutes       |

Abbreviations: BH: Buttonhole; TRL: traditional RL; RL: rope-ladder; HD: hemodialysis; A: arterial; V: venous; SD: standard deviation
