# Supplementary material for: Cannulation Technique of Vascular Access in Hemodialysis and the Impact on the Arteriovenous Fistula Survival: Systematic Review and Meta-Analysis
Source: MDPI journal article supplement (doi:10.3390/jcm12185946), 2023-09-13
Supplement: s1 [file s1]

**Table S7.** Pain as an outcome of the cannulation technique in arteriovenous fistulas in Observational studies

| First author                        | Study design  | Average age<br>(years) | Sample size           |                  | Outcome                            |                                    | P Value              | Notes                                                                                                                      |
|-------------------------------------|---------------|------------------------|-----------------------|------------------|------------------------------------|------------------------------------|----------------------|----------------------------------------------------------------------------------------------------------------------------|
|                                     |               |                        | Experimental<br>group | Control<br>group | Experimental<br>group              | Control<br>group                   |                      |                                                                                                                            |
| van Loon et al.<br>(2010) [14]      | Observational | BH = 67<br>RL = 65     | 75                    | 70               | Mean 1.6 (0-5)                     | Mean 1.0 (0 – 5.4)                 | < 0.0001             | Was used Verbal Rating Scale. Used local anaesthetic cream. Use of local anaesthetic cream (BH 8% vs RL 30% $p < 0.0001$ ) |
| Pergolotti et al.<br>(2011) [29]    | Observational | BH = 56<br>TRL = 66.5  | 21                    | 24               | Average pain<br>47.8% or less      | -                                  | = 0.0049             | Was used Visual Analog Scale. Used analgesic medications.                                                                  |
| SuKthinthai et al.<br>(2012) [32]   | Cross-over    | 56.3                   | 21                    | 21               | V = 1.38 ± 0.75<br>A = 1.20 ± 0.90 | V = 5.88 ± 0.82<br>A = 6.03 ± 0.90 | < 0.0001<br>< 0.0001 | Was used Verbal Rating Scale.                                                                                              |
| Mi-Kyoung KIM<br>et al. (2013) [33] | Cross-over    | 62.4                   | 32                    | 32               | V = 5.1 ± 1.8<br>A = 3.3 ± 1.8     | V = 6.3 ± 1.3<br>A = 6.1 ± 1.2     | < 0.001<br>< 0.001   | Was used Visual Analog Scale.                                                                                              |
| Smyth W et al.<br>(2013) [30]       | Observational | BH = 60<br>RL = 61     | 41                    | 63               | 1.9 (1 - 6)<br>SD = 1.069          | 1.82 (1-5)<br>SD = 0.934           | = 0.607              | Was used Visual Analog Scale. Local anaesthetic is used.                                                                   |

Abbreviations: BH: Buttonhole; TRL: traditional RL; RL: rope-ladder; A: arterial; V: venous; SD: standard deviation.
