# Supplementary material for: Cannulation Technique of Vascular Access in Hemodialysis and the Impact on the Arteriovenous Fistula Survival: Systematic Review and Meta-Analysis
Source: MDPI journal article supplement (doi:10.3390/jcm12185946), 2023-09-13
Supplement: s1 [file s1]

**Table S4.** Bacteremia and local signs of infection as an outcome of the cannulation technique in arteriovenous fistulas in RCT studies

| First author                                                           | Study design | Average age (years)                     | Sample size        |               | Outcome                  |                            | P Value | Notes                                                                                                                          |
|------------------------------------------------------------------------|--------------|-----------------------------------------|--------------------|---------------|--------------------------|----------------------------|---------|--------------------------------------------------------------------------------------------------------------------------------|
|                                                                        |              |                                         | Experimental group | Control group | Experimental group       | Control group              |         |                                                                                                                                |
| Bacteremia and local signs of infection related to access (n = events) |              |                                         |                    |               |                          |                            |         |                                                                                                                                |
| Struthers J. et al. (2010) [26]                                        | RCT          | BH = 61<br>TRL = 60                     | 28                 | 28            | 1                        | 0                          | --      | - 1 local infection, had antibiotic therapy                                                                                    |
| MacRae J. et al. (2012) [13]                                           | RCT          | BH = 70.3<br>SN = 66.7                  | 70                 | 70            | 50/1000 HD sessions<br>3 | 22.4/1000 HD sessions<br>0 | = 0.003 | - Rate of localized signs of infection<br>- BH - 3 S. aureus bacteremia and 9 Site abscesses that had antibiotic therapy       |
| Vaux E. et al. (2013) [27]                                             | RCT          | BH = 62<br>UP = 64                      | 58                 | 69            | 0.12/1000 AVF days<br>0  | 0<br>0.09/1000 AVF days    | --      | BH 2 exit-site infections<br>UP = 2 Bacteremia.                                                                                |
| MacRae J. et al. (2014) [16]                                           | RCT          | BH = 70.3<br>SN = 66.7                  | 70                 | 69            | 3<br>9                   | 0<br>0                     | < 0.001 | - BH – 3 Localized/exit site<br>- BH 9 S. aureus bacteremia<br>- Median time to first infection for buttonhole was 11.1 months |
| Chan M. et al. (2014) [28]                                             | CCT          | BH = 60.9<br>RL = 64.1                  | 45                 | 38            | 5 (11%)                  | 3 (8%)                     | 0.62    | - Bacteriemia.                                                                                                                 |
| Peralta R. et al. (2022) [19]                                          | RCT          | MuST= 68.48<br>BH = 68.78<br>RL = 65.95 | 59                 | 56<br>57      | 0                        | 1 (1.8%)<br>0              | --      | - Localized signs of infection                                                                                                 |

Abbreviations: RCT: randomized clinical trial; CCT: controlled clinical trial; BH: Buttonhole; TRL: traditional RL; UP: usual practice; SN: standard needling; MuST: multiple single cannulation technique; RL: rope-ladder; HD: hemodialysis
