# Supplementary material for: Cannulation Technique of Vascular Access in Hemodialysis and the Impact on the Arteriovenous Fistula Survival: Systematic Review and Meta-Analysis
Source: MDPI journal article supplement (doi:10.3390/jcm12185946), 2023-09-13
Supplement: s1 [file s1]

**Table S6.** Pain as an outcome of the cannulation technique in arteriovenous fistulas in RCT studies

| First author                    | Study design | Average age (years)    | Sample size        |               | Outcome                      |                              | P Value | Notes                                                                                                                                     |
|---------------------------------|--------------|------------------------|--------------------|---------------|------------------------------|------------------------------|---------|-------------------------------------------------------------------------------------------------------------------------------------------|
|                                 |              |                        | Experimental group | Control group | Experimental group           | Control group                |         |                                                                                                                                           |
| Struthers J. et al. (2010) [26] | RCT          | BH = 61<br>TRL = 60    | 28                 | 28            | median 2.5                   | median 1                     |         | Was used visual analogue scoring system. Used local anesthetic. Nine of 22 patients in the BH reduced or stopped local anesthetic.        |
| MacRae J. et al. (2012) [13]    | RCT          | BH = 70.3<br>SN = 66.7 | 70                 | 70            | median 1.5<br>IQR, 0.5 – 3.4 | median 1.2<br>IQR, 0.4 – 2.4 | = 0.57  | Was used visual analogue scale. One-quarter of them used anesthetic with needling.                                                        |
| Vaux E. et al. (2013) [27]      | RCT          | BH = 62<br>UP = 64     | 58                 | 69            | median 1.3<br>IQR, 1.2 -1.9  | median 1.2<br>IQR, 1.0 -1.5  | = 0.05  | Was used self-reported modified numeric pain rating scale. Used local anesthetic. 8 patients in the BH abandoned cannulation due to pain. |

Abbreviations: RCT: randomized clinical trial; BH: Buttonhole; TRL: traditional RL; UP: usual practice; SN: standard needling; RL: rope-ladder; IQR: interquartile range
