# Supplementary material for: Cannulation Technique of Vascular Access in Hemodialysis and the Impact on the Arteriovenous Fistula Survival: Systematic Review and Meta-Analysis
Source: J Clin Med. 2023 Sep 13;12(18):5946. doi: 10.3390/jcm12185946 (PMC10532371; doi:10.3390/jcm12185946)
Supplement: Supplementary file 1 [file jcm-12-05946-s001.zip]

Archive with 13 entries (13 files):
- Figure S1. Summary of the risk of bias of the 5 domains assessed in each RCT.jpg
- Figure S2. Summary of the risk of bias of the 7 domains assessed from the observational.jpg
- Table S1 - Characteristics of observational studies.pdf
- Table S10 - Aneurism formationdevelopment as an outcome of the cannulation technique in arteriovenous fistulas in RCT studies.pdf
- Table S11 - Aneurism formationdevelopment and Unsuccessful cannulation as an outcome of the cannulation technique in arteriovenous fistulas in Observ.pdf
- Table S2 - Relative effect of the unassisted primary patency of arteriovenous fistula.pdf
- Table S3 - Number of interventions and thrombosis as the outcome of cannulation techniques in arteriovenous fistulas.pdf
- Table S4 - Bacteremia and local signs of infection as an outcome of the cannulation technique in arteriovenous fistulas in RCT studies.pdf
- Table S5 - Bacteremia and local signs of infection as an outcome of the cannulation technique in arteriovenous fistulas in Observational studies.pdf
- Table S6 - Pain as an outcome of the cannulation technique in arteriovenous fistulas in RCT studies.pdf
- Table S7 - Pain as an outcome of the cannulation technique in arteriovenous fistulas in Observational studies.pdf
- Table S8 - Hematoma and bleeding time as an outcome of the cannulation technique in arteriovenous fistulas in RCT studies.pdf
- Table S9 - Hematoma and bleeding time as an outcome of the cannulation technique in arteriovenous fistulas in Observational studies.pdf
